# Supplementary material
Source: PubMed Central journal article supplement (PMC5784827)
Supplement: NIHMS931567-supplement-Supplement1.pdf [file NIHMS931567-supplement-Supplement1.pdf]

## Supplementary Appendix

This appendix has been provided by the authors to give readers additional information about their work.

Supplement to: Kulkarni AV, Schiff SJ, Mbabazi-Kabachelor E, et al. Endoscopic treatment versus shunting for infant hydrocephalus in Uganda. *N Engl J Med* 2017;377:2456-64. DOI: 10.1056/NEJMoa1707568

Supplementary Appendix for  
Endoscopic Treatment versus Shunting for Infant Hydrocephalus in Uganda

Contents:

|                                                                               |   |
|-------------------------------------------------------------------------------|---|
| Research Team and Acknowledgements .....                                      | 2 |
| Table S1. Post hoc analyses of outcomes at 12 months .....                    | 3 |
| Table S2. Patient characteristics at baseline for treatment as received ..... | 4 |
| Table S3. Outcomes at 12 months for treatment as received.....                | 5 |
| Table S4. Outcome results for brain growth.....                               | 7 |

Investigators:

Abhaya V. Kulkarni, M.D., Ph.D. <sup>1,2</sup>, Steven J. Schiff, M.D., Ph.D. <sup>3</sup>, Edith Mbabazi Kabachelor, MD, MSc <sup>4</sup>, John Mugamba, M.D. <sup>4</sup>, Peter Ssenyonga, M.D. <sup>4</sup>, Ruth Donnelly, Ph.D. <sup>2</sup>, Jody Levenbach, Ph.D. <sup>2</sup>, Vishal Monga, Ph.D. <sup>3</sup>, Mallory Peterson, B.S. <sup>3</sup>, Michael MacDonald, M.S. <sup>3</sup>, Venkateswararao Cherukuri, M. Tech. <sup>3</sup>, \*Benjamin C. Warf M.D. <sup>4,5,6</sup>

1. University of Toronto, Toronto, Canada
2. The Hospital for Sick Children, Toronto, Canada
3. The Pennsylvania State University, University Park, PA
4. CURE Children’s Hospital of Uganda, Mbale, Uganda
5. Harvard Medical School, Boston, MA
6. Boston Children’s Hospital, Boston, MA

## Research Team and Acknowledgements

Steering committee: Benjamin C Warf (Harvard University, USA), Steven J Schiff (Pennsylvania State University, USA), Abhaya V Kulkarni (University of Toronto, Canada)

Other Investigators: Edith Mbabazi (CURE Children's Hospital of Uganda, Uganda), John Mugamba (CURE Children's Hospital of Uganda, Uganda), Peter Ssenyonga (CURE Children's Hospital of Uganda, Uganda), Ruth Donnelly (The Hospital for Sick Children, Canada), Jody Levenbach (The Hospital for Sick Children, Canada), Vishal Monga (Pennsylvania State University, USA), Mallory Peterson (Pennsylvania State University, USA), Michael MacDonald (Pennsylvania State University, USA), Venkateswararao Cherukuri (Pennsylvania State University, USA)

Data Safety Monitoring Board: Jay Riva-Cambrin (Chair) (University of Calgary, Canada), Michael Scott (Harvard University, USA), Graham Fieggen (University of Cape Town, South Africa), Julius Kiwanuka (Mbarara University of Science & Technology, Uganda), Francis Bajunirwe (Mbarara University of Science & Technology, Uganda)

Research assistants: Esther Nalule, Julie Johnson, John Kimbugwe, Brian Nsubuga Kaaya, and Paddy Ssentongo.

The steering committee designed the trial and analysis plan, wrote the manuscript, and take responsibility for protocol adherence and study results. All steering committee members and investigators approved the final manuscript. The independent Data Safety Monitoring Board provided oversight of the study conduct.

The authors thank the following individuals for their review of an earlier version of this manuscript: Mohit Bhandari (McMaster University), Eyal Cohen and Daniel Roth (University of Toronto), Ellen Grant (Harvard University), Richard Holubkov (University of Utah), and Michael Glantz and Robert Harbaugh (Pennsylvania State University).

**Table S1. Post hoc analyses of outcomes at 12 months\***

|                                                | Overall              | Randomized to ETV/CPC | Randomized to VPS    | Difference (95% confidence interval) for VPS compared to ETV/CPC † |
|------------------------------------------------|----------------------|-----------------------|----------------------|--------------------------------------------------------------------|
| BSID Cognitive, change from baseline           | 0 (-1, 4)            | 0 (-1, 4)             | 0 (-1, 4)            | 0 (-2, 1)                                                          |
| BSID Expressive Language, change from baseline | 0 (-3, 2)            | -1 (-3, 1)            | 0 (-3, 2)            | 1 (-1, 2)                                                          |
| BSID Receptive Language, change from baseline  | -1 (-4, 2)           | -1 (-4, 1)            | -1 (-3, 2)           | 1 (-1, 2)                                                          |
| BSID General Motor, change from baseline       | -0.5 (-3, 0)         | 0 (-3, 1)             | -1 (-3, 0)           | 0 (-1, 1)                                                          |
| BSID Fine Motor, change from baseline          | 0 (-2, 3)            | 0 (-2, 3)             | 0 (-2, 3)            | 0 (-1, 2)                                                          |
| Normal brain volume at 12 months, N (%)        | 23 (24.5%)           | 10 (21.3%)            | 13 (27.7%)           | 6.4% (-11.0%, 23.7%)                                               |
| Substantial brain growth at 12 months, N (%)   | 25 (26.6%)           | 8 (17.0%)             | 17 (36.2%)           | 19.1% (1.7%, 36.6%)                                                |
| Head circumference, cm                         | 48.9<br>(46.4, 51.1) | 49.0<br>(47.5, 52.0)  | 48.0<br>(45.3, 50.8) | -1.6<br>(-3.0, -0.2)                                               |
| Change in head circumference from baseline, cm | 0.1<br>(-2.3, 2.8)   | 1.9<br>(-0.1, 4.7)    | -1.7<br>(-4.3, 0.2)  | -4.0<br>(-5.5, -2.5)                                               |

\* Data are median (interquartile range) or number (percent). Twelve-month data for head circumference, BSID scores, and volumes were available on 47 patients in each treatment group (94 patients total).

† Hodges-Lehmann estimates and 95% confidence intervals were used for differences in medians and normal approximation for differences in proportions. Because of the use of the Hodges-Lehmann estimator, the estimated difference is not the crude difference in the medians.

**Table S2. Patient characteristics at baseline for treatment as received\***

|                                                            | Overall           | Received<br>ETV/CPC (N=43) | Received VPS<br>(N=57) |
|------------------------------------------------------------|-------------------|----------------------------|------------------------|
| Age at randomization, months                               | 3.1 (2.6, 4.1)    | 3.3 (2.2, 4.2)             | 3.1 (2.7, 4.0)         |
| Sex, female                                                | 39 (39.0%)        | 16 (37.2%)                 | 23 (40.4%)             |
| Weight, kilograms                                          | 6.0 (5.0, 7.0)    | 5.6 (4.5, 7.0)             | 6.2 (5.4, 7.15)        |
| Head circumference, cm                                     | 48.5 (45.2, 50.8) | 48.5 (44.5, 50.0)          | 48.3 (45.5, 53.4)      |
| Bayley Scales of Infant Development (BSID) Scaled Scores † |                   |                            |                        |
| BSID Cognitive                                             | 1 (1, 5)          | 1 (1, 5)                   | 1 (1, 5)               |
| BSID Expressive Language                                   | 3 (1, 6)          | 4 (2, 7)                   | 2 (1, 5)               |
| BSID Receptive Language                                    | 6 (1, 8)          | 6 (3, 9)                   | 4 (1, 8)               |
| BSID General Motor                                         | 3 (1, 5)          | 3 (1, 6)                   | 2 (1, 4)               |
| BSID Fine Motor                                            | 3 (1, 5)          | 4 (1, 6)                   | 3 (1, 4)               |
| Brain and CSF volumes                                      |                   |                            |                        |
| CSF volume, cm <sup>3</sup>                                | 783 (570, 1050)   | 746 (559, 992)             | 790 (617, 1331)        |
| Brain volume, z-score                                      | -2.6 (-3.2, -1.9) | -2.6 (-3.2, -1.7)          | -2.6 (-3.3, -2.0)      |
| Normal brain volume                                        | 10/99 (10.1%)     | 5/42 (11.9%)               | 5/57 (8.8%)            |

\* Data are median (interquartile range) or number (percent). Brain and CSF volume data were available for 42 ETV/CPC and 57 VPS infants. There were no significant between-group differences in the characteristics listed except for BSID Receptive Language (p=0.03, Mann-Whitney).

† BSID scaled scores range from 1 to 19 (higher scores indicate better performance). Scores are scaled to general population mean of 10 and standard deviation (SD) of 3.

Table S3. Outcomes at 12 months for treatment as received \*

|                                                   | Overall              | Received<br>ETV/CPC  | Received<br>VPS      | p-<br>value† | Difference (95%<br>confidence interval)<br>for VPS compared to<br>ETV/CPC ‡ |
|---------------------------------------------------|----------------------|----------------------|----------------------|--------------|-----------------------------------------------------------------------------|
| Primary outcome                                   |                      |                      |                      |              |                                                                             |
| BSID Cognitive                                    | 3 (1, 6)             | 4 (1, 7)             | 3 (1, 5)             | 0.65         | 0 (-1, 1)                                                                   |
| Secondary outcomes                                |                      |                      |                      |              |                                                                             |
| BSID Expressive Language                          | 2 (1, 5)             | 2 (1, 5)             | 3 (1, 5)             | 0.96         | 0 (-1, 1)                                                                   |
| BSID Receptive Language                           | 4 (3, 6)             | 5 (3, 6)             | 4 (3, 6)             | 0.51         | 0 (-1, 1)                                                                   |
| BSID General Motor                                | 1 (1, 3)             | 1 (1, 4)             | 1 (1, 2)             | 0.16         | 0 (0, 0)                                                                    |
| BSID Fine Motor                                   | 4 (1, 7)             | 4 (1, 7)             | 3 (1, 6)             | 0.38         | 0 (-2, 0)                                                                   |
| CSF volume, 12 months, cc                         | 311<br>(97, 526)     | 520<br>(322, 704)    | 167<br>(77, 341)     | <0.001       | -307<br>(-412, -216)                                                        |
| Brain volume, 12 months,<br>z-score               | -2.3<br>(-3.3, -1.0) | -2.3<br>(-3.5, -1.0) | -2.3<br>(-3.2, -1.0) | 0.49         | 0.2<br>(-0.5, 0.9)                                                          |
| Treatment failure                                 | 30 (30.0%)           | 15 (34.9%)           | 15 (26.3%)           | 0.39         | -8.6%<br>(-26.7, 9.6%)                                                      |
| Infection                                         | 4 (4.0%)             | 0 (0%)               | 4 (7.0%)             | 0.13         | 7.0%<br>(0.1%, 14.8%)                                                       |
| All-cause mortality                               | 6 (6.0%)             | 3 (7.0%)             | 3 (5.3%)             | 1.00         | -1.7%<br>(-11.3, 7.9%)                                                      |
| Post hoc outcomes                                 |                      |                      |                      |              |                                                                             |
| BSID Cognitive, change<br>from baseline           | 0 (-1, 4)            | 0 (-1, 5)            | 0 (-1, 4)            |              | 0 (-2, 1)                                                                   |
| BSID Expressive Language,<br>change from baseline | 0 (-3, 2)            | -1 (-5, 1)           | 0 (-2, 2)            |              | 1 (-1, 3)                                                                   |
| BSID Receptive Language,<br>change from baseline  | -1 (-4, 2)           | -1 (-5, 1)           | 0 (-3, 2)            |              | 1 (0, 3)                                                                    |

|                                                |                      |                      |                      |  |                          |
|------------------------------------------------|----------------------|----------------------|----------------------|--|--------------------------|
| BSID General Motor, change from baseline       | -0.5 (-3, 0)         | -1 (-3, 2)           | -1 (-3, 0)           |  | 0 (-1, 1)                |
| BSID Fine Motor, change from baseline          | 0 (-2, 3)            | 0 (-2, 3)            | 0 (-2, 4)            |  | 0 (-1, 2)                |
| Normal brain volume, 12 months, N (%)          | 23 (24.5%)           | 10 (25.0%)           | 13 (24.1%)           |  | -1.0%<br>(-18.5%, 16.7%) |
| Substantial brain growth at 12 months, N (%)   | 25 (26.6%)           | 6 (15.0%)            | 19 (35.2%)           |  | 20.2%<br>(2.1%, 38.3%)   |
| Head circumference, cm                         | 48.9<br>(46.4, 51.1) | 49.7<br>(48.2, 52.3) | 47.9<br>(45.1, 50.1) |  | -2.6<br>(-3.9, -1.2)     |
| Change in head circumference from baseline, cm | 0.1<br>(-2.3, 2.8)   | 2.6<br>(0.3, 5.5)    | -1.0<br>(-3.6, 0.3)  |  | -4.4<br>(-5.9, -2.9)     |

\* Data are median (interquartile range) or number (percent). Twelve month data for head circumference, BSID scores, and volumes were available on 40 ETV/CPC patients and 54 VPS patients (94 patients total).

† P-values are Mann-Whitney test or Fisher's exact test.

‡ Hodges-Lehmann estimates and 95% confidence intervals were used for differences in medians and normal approximation for differences in proportions. Because of the use of the Hodges-Lehmann estimator, the estimated difference is not the crude difference in the medians.

**Table S4. Outcome results for brain growth\***

|                                                         | Difference (95% confidence interval) for those achieving <i>normal brain volume</i> (N=23) compared to not | Difference (95% confidence interval) for those achieving <i>substantial brain growth</i> (N=25) compared to not |
|---------------------------------------------------------|------------------------------------------------------------------------------------------------------------|-----------------------------------------------------------------------------------------------------------------|
| BSID Scaled Scores at 12 months                         |                                                                                                            |                                                                                                                 |
| BSID Cognitive                                          | 1 (0, 3)                                                                                                   | 1 (0, 3)                                                                                                        |
| BSID Expressive Language                                | 1 (0, 2)                                                                                                   | 1 (0, 2)                                                                                                        |
| BSID Receptive Language                                 | 1 (0, 2)                                                                                                   | 0 (-1, 1)                                                                                                       |
| BSID General Motor                                      | 2 (0, 2)                                                                                                   | 0 (0, 0)                                                                                                        |
| BSID Fine Motor                                         | 3 (1, 5)                                                                                                   | 2 (1, 4)                                                                                                        |
| Change in BSID Scaled Scores at 12 months from baseline |                                                                                                            |                                                                                                                 |
| BSID Cognitive, change from baseline                    | 1 (-1, 3)                                                                                                  | 2 (0, 4)                                                                                                        |
| BSID Expressive Language, change from baseline          | 0 (-3, 2)                                                                                                  | 0 (-1, 2)                                                                                                       |
| BSID Receptive Language, change from baseline           | 0 (-2, 2)                                                                                                  | 0 (-2, 2)                                                                                                       |
| BSID General Motor, change from baseline                | 1 (0, 3)                                                                                                   | 1 (0, 3)                                                                                                        |
| BSID Fine Motor, change from baseline                   | 3 (1, 4)                                                                                                   | 3 (2, 5)                                                                                                        |

\* Hodges-Lehmann estimates and 95% confidence intervals were used for differences in medians. Because of the use of the Hodges-Lehmann estimator, the estimated difference is not the crude difference in the medians.
